# Supplementary material for: GPI-anchor synthesis is indispensable for the germline development of the nematode Caenorhabditis elegans
Source: PubMed Central journal article supplement — Mol Biol Cell. 2012 Mar 15;23(6):982–95. doi: 10.1091/mbc.E10-10-0855 (PMC3302757; doi:10.1091/mbc.e10-10-0855), 2012-03-15
Supplement: supp_E10-10-0855v1_CombinedSupMats.pdf [file supp_E10-10-0855v1_CombinedSupMats.pdf]

Supplementary Figure 1

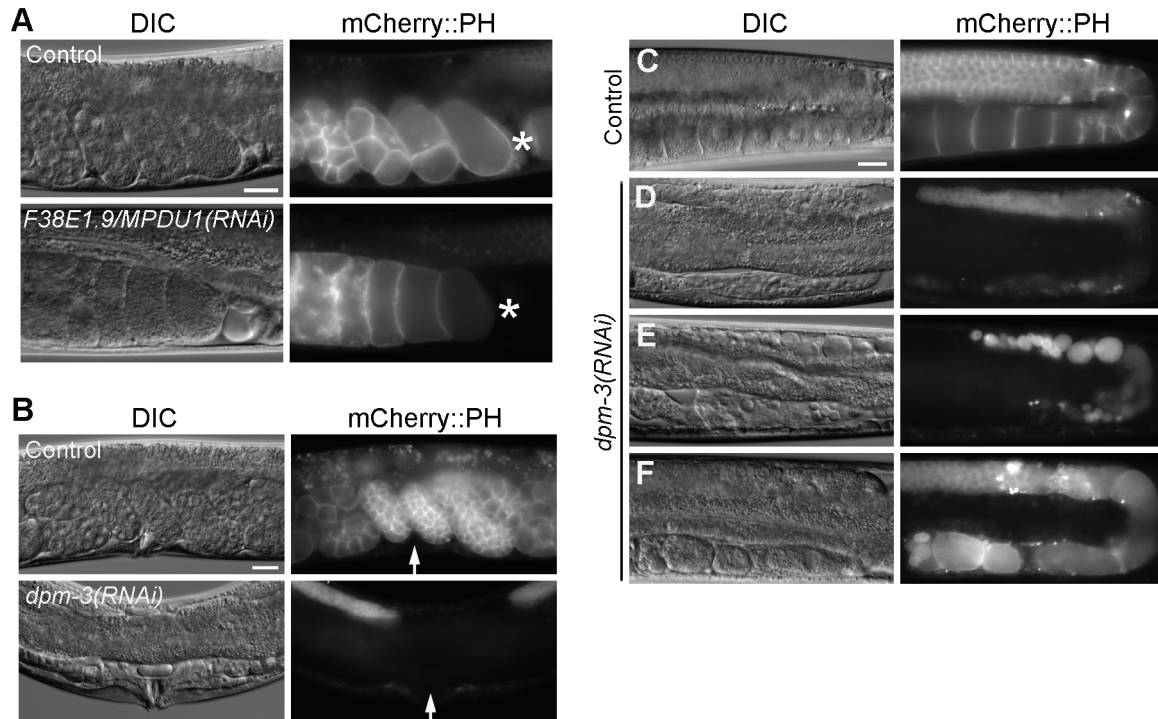

**Supplementary Figure 1.** RNAi of genes involved in the synthesis of both GPI-anchor and N-linked/O-linked oligosaccharides resulted in severe germline phenotypes. (A) Knockdown of the *F38E1.9/MPDU1* resulted in the oocyte abnormality similar to the phenotype shown in Figure 3E. Asterisks indicate the spermatheca. (B) In *dpm-3* RNAi-treated worms, no eggs were found in the uteri. Arrows indicate the position of the vulva. (C-F) Abnormalities of germline cells in *dpm-3* RNAi-treated worms with no eggs (B). Wild-type gonad with normal oocytes in control RNAi-treated worms (C). Gonad with no matured oocytes (D, 42%,  $n=24$ ), with disrupted germ cell proliferation and germline syncytium (E, 33%,  $n=24$ ) and with irregularly shaped oocytes (F, 25%,  $n=24$ ) in *dpm-3* RNAi-treated worms. Bars, 20  $\mu\text{m}$ .

## Supplementary Figure 2

|           |     |                                                                  |
|-----------|-----|------------------------------------------------------------------|
| Hs PIGA   | 1   | MACRGGAGNGHRASATLSRVSPGSLYTCRTRTHNIMVSDFFYPNMGGVESHYQLSQCL       |
| Ce PIGA-1 | 1   | -----MSLKI GPYSI ALVSDFFCPNAGGVETHI YFLAQCL                      |
| Sc SPT14  | 1   | -----NCFNI AMLCDDFFYPQLGGVEFHI YHLSQCL                           |
|           |     |                                                                  |
| Hs PIGA   | 61  | IERGHKVIIVTHAYGNRKGIRYLSISGLKVVYLPKVMYNQSTATTLEHSLPLLRVIFVRE     |
| Ce PIGA-1 | 36  | I ELGHRVVMITHCYGNRKGIRYLSNGLKVVYLPFI MAYNGATLGSIVGSMVPLRKVLLRE   |
| Sc SPT14  | 31  | IDLGHSVVIITHAYKDRVGVRLTNGLKVVHVPFVIFRETTFPITVSTFPIIRNLLRE        |
|           |     |                                                                  |
| Hs PIGA   | 121 | RVTIIVSHSSFSAMAHDAIFHAKTIVGLQTVFTDHSLFGFADVSSMLTNKL-LTVSLCDTN    |
| Ce PIGA-1 | 96  | NVCIIVHSTFSSLAHETLMIGGLMGLRTVFTDHSLFGFADASALTNKLVLCYSLINVD       |
| Sc SPT14  | 91  | QIQIVHSHGSASTFAHEGILHANTVGLRTVFTDHSLYGFNNLTSIVVWVKL-LTFTLTNI D   |
|           |     |                                                                  |
| Hs PIGA   | 180 | HIIVCVSYTSKENTVLRRAALNPEIVSVIPNAVDPDTFTP-----DPFRRHDS-LTI VVVS   |
| Ce PIGA-1 | 156 | QTIIVCVSYTSKENTVLRGKLDPNKVSTIPNAIETSLFTP-----DRNQFFNNPTTI VFLG   |
| Sc SPT14  | 150 | RVIIVCVSNTCKENMIVRTELSPDIIVSVIPNAVVEDDFKPRDPTGGTKRKQSRDKIVLVIG   |
|           |     |                                                                  |
| Hs PIGA   | 233 | RLVYRKGIDLLSGIPELICKYKYPDLNFIIGGEGPKRIILEEVRERYQLHDRVRLGALRH     |
| Ce PIGA-1 | 210 | RLVYRKGADLLCEIIVPKVCAHKSVRFIIGGDGPKRIIELEEMLERFKLHERVVLGMLPH     |
| Sc SPT14  | 210 | RLVFPNKGSDLLTRIIIPKVCSSHEDVEFIVAGDGPKFIIDFQQMESHRLCKRVQLLGSVPH   |
|           |     |                                                                  |
| Hs PIGA   | 293 | KDVRNVLVCGHIFLNTSLTEAFCMIVVEAASCGLQVVSTRVGGIPEVLP-ENLII LCEPS    |
| Ce PIGA-1 | 270 | NCVKRVLNCCQIFLNTSLTEAFCMSIVVEAASCGLHVVSTRVGGVPEVLPVGEFISLEEPV    |
| Sc SPT14  | 270 | EKVRDVLCCQDIYHLSLTEAFGTILVEAASCNLLIMTTQVGGIPEVLPNEMTVYAEQTS      |
|           |     |                                                                  |
| Hs PIGA   | 352 | VKSLICEGLEKAIIFQLKSGTLIPAPENIINIIVKTFYITWRNVAERTEKVVDRVSVAVLPMDK |
| Ce PIGA-1 | 330 | PDDLVDALLKAVDRREKGLIMDPTKEHEAVSKVYNMPDVAARTQVIYQKA-VESEP--TG     |
| Sc SPT14  | 330 | VSDLVQATNKAINIIRSKALDTSFHDVSKVYDVMVAKRTVEIYTNISSTSSADDKD         |
|           |     |                                                                  |
| Hs PIGA   | 412 | RLDRLIIVSHCGPV---TCYIFALLAVFNFLFLIFLRWMTPDSIIVDAI DATGPRGAWTNNY  |
| Ce PIGA-1 | 387 | RLGRLKGYVDQG---ICFGIMYIVMS---CIIIFWLTIVLDFD-----SPRKNGTNDK       |
| Sc SPT14  | 389 | WMKIVANLYIKRDGIWAKHLYLCCGIVEYMLFFLLEWLYPRDEID-----LAPKWPKKTVS    |
|           |     |                                                                  |
| Hs PIGA   | 469 | SHSKRGGENNEI SETR                                                |
| Ce PIGA-1 | 434 | TSEKNVDPDYQ-----                                                 |
| Sc SPT14  | 444 | NETKEARET-----                                                   |

**Supplementary Figure 2.** ClustalW alignment of the predicted amino acid sequences of *H. sapiens* PIGA (Hs PIGA), *C. elegans* PIGA-1 (Ce PIGA-1) and *S. cerevisiae* SPT14 (Sc SPT14). Identical amino acids are shaded in black and similar amino acids are shaded in gray. The PIGA domain is underlined with a solid line, and the glycosyltransferase group 1 domain is shown as a dashed line.

Supplementary Figure 3

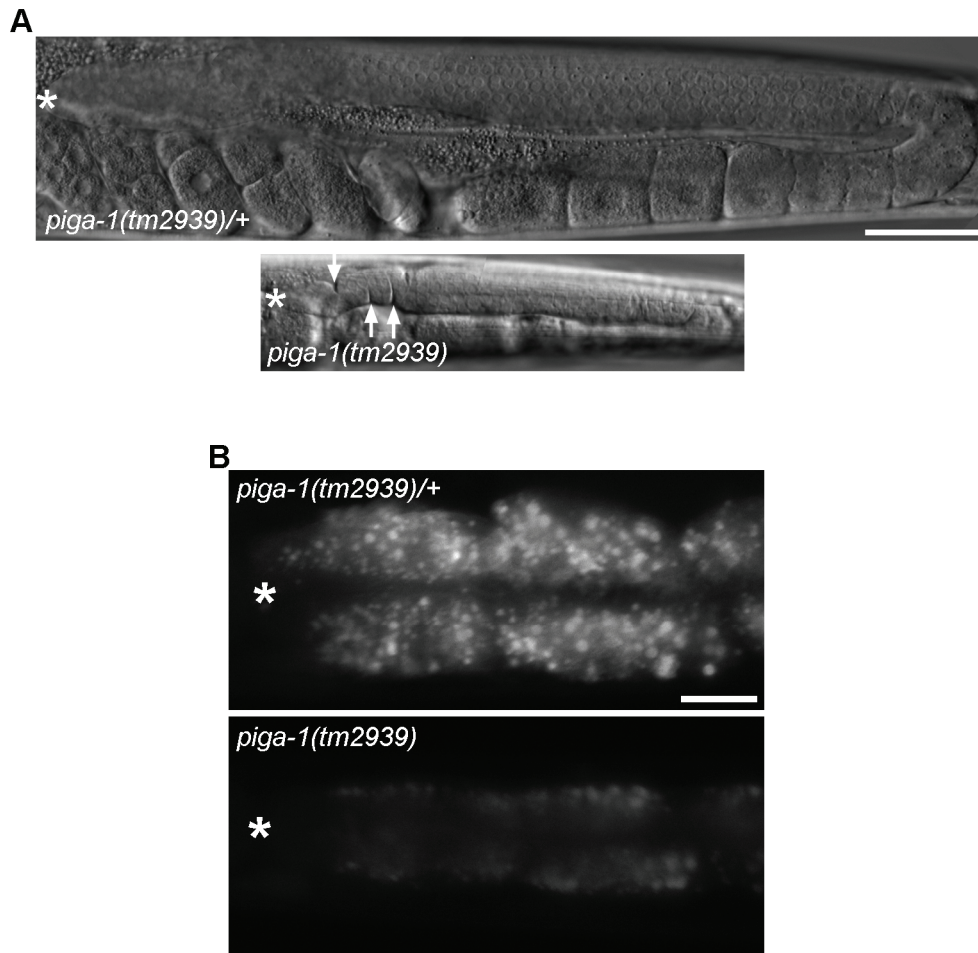

**Supplementary Figure 3.** Abnormalities of somatic tissues in the *piga-1(tm2939)* worm. (A) Gonads of *piga-1(tm2939)/+* and *piga-1(tm2939)* worms. Gonad size was decreased in *piga-1(tm2939)* worms. Some animals showed wrinkled gonadal arms (arrows). Asterisks indicate DTCs. (B) Intestines of *piga-1(tm2939)/+* and *piga-1(tm2939)* worms. Autofluorescent granules in the intestinal cells were visualized using a DAPI filter under UV illumination. Autofluorescence of the granules was decreased in the intestine of *piga-1(tm2939)* worms. Asterisks indicate the position of the pharyngeal-intestinal valve. Bars, 50  $\mu\text{m}$  (A) and 20  $\mu\text{m}$  (B).

## Supplementary Figure 4

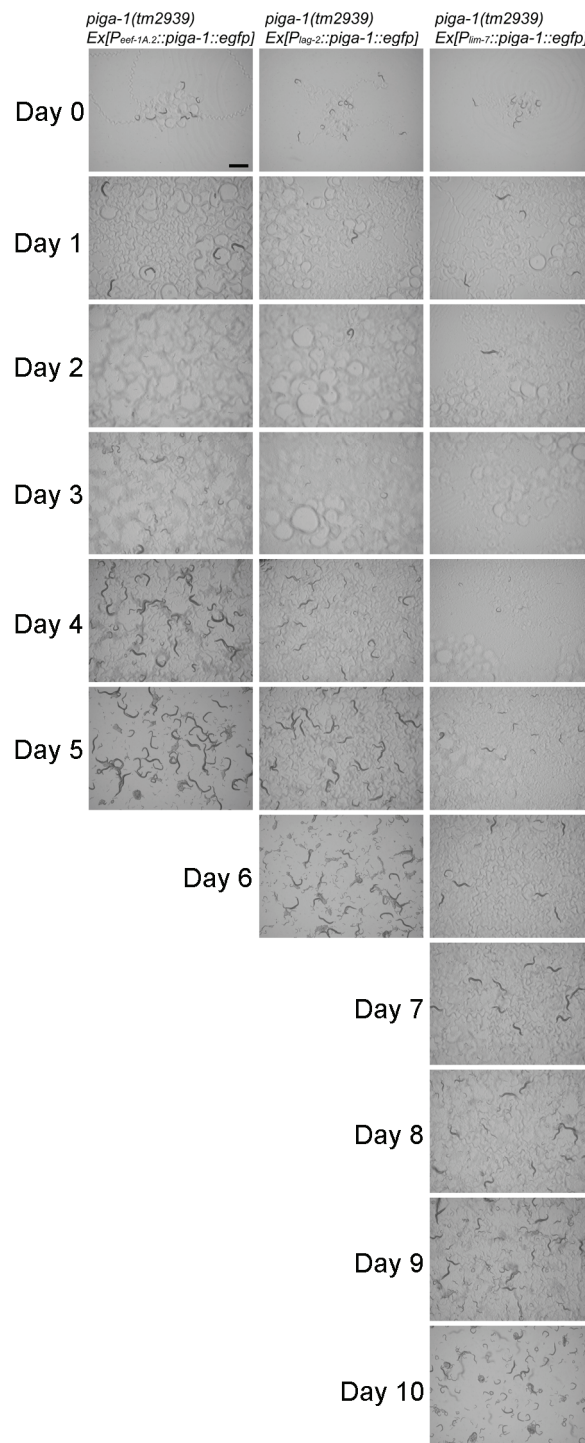

**Supplementary Figure 4.** Growth of the *piga-1(tm2939)* rescue lines on NGM plate. Ten rescued L4 worms were placed on a fresh NGM plate seeded with OP50 and maintained at 20° C. Microscopic images of worms on the plates were acquired with an OLYMPUS SZX12 microscope (OLYMPUS) equipped with a digital camera (Nikon COOLPIX 990, Nikon) every 24 h until bacteria on the plate were depleted. The *P<sub>lim-7</sub>::piga-1::egfp* rescue line showed slow growth and proliferation compared with the *P<sub>eef-1A,2</sub>::piga-1::egfp* rescue line and the *P<sub>lag-2</sub>::piga-1::egfp* rescue line. It took 10 days for the *P<sub>lim-7</sub>::piga-1::egfp* rescue line to eat up all the OP50 bacteria on the plate, while it took 5 and 6 days for the *P<sub>eef-1A,2</sub>::piga-1::egfp* rescue line and *P<sub>lag-2</sub>::piga-1::egfp* rescue line, respectively. Bar, 1 mm (measured with an eyepiece micrometer).



Supplementary Figure 5

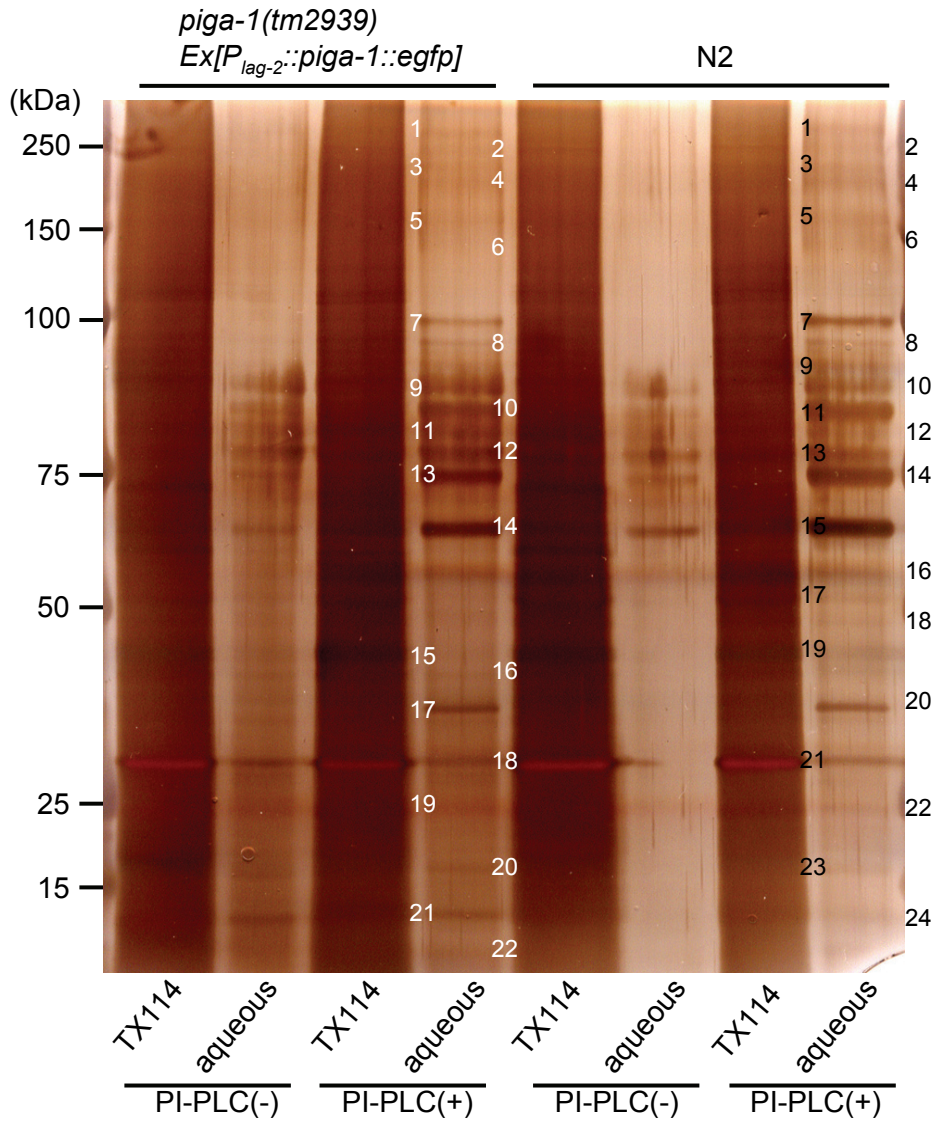

**Supplementary Figure 5.** The extracted GPI-anchored proteins were separated by SDS-PAGE and stained with Silver stain MS kit (Wako). The silver-stained gel including samples before PI-PLC treatment (PI-PLC (-)) and after PI-PLC treatment (PI-PLC(+)) is shown. Numbers indicate the positions of possible GPI-anchored protein bands. Black numbers, N2; white numbers, *piga-1(tm2939) Ex[P<sub>lag-2</sub>::piga-1::egfp]*.

## Supplementary Table 1

| Band | CDS/<br>Public name | Description                                                    | Phenotype                                | Human homolog                                     |
|------|---------------------|----------------------------------------------------------------|------------------------------------------|---------------------------------------------------|
| 1    | Y16B4A.2            | serine-type carboxypeptidase activity                          | n/a                                      | lysosomal protective protease isoform a precursor |
| 4    | Y41D4B.16/<br>hpc-6 | uncharacterized                                                | n/a                                      | isoform 2 of mucin-3A                             |
| 6    | F23B2.11/<br>pcp-3  | prolyl carboxypeptidase like                                   | n/a                                      | thymus-specific serine protease                   |
|      | Y40D12A.2           | serine carboxypeptidases (lysosomal cathepsin A)               | Lva, Emb,<br>protein aggregation variant | lysosomal protective protein isoform a precursor  |
|      | C29F3.7             | positive regulation of growth rate                             | maternal Ste                             | n/a                                               |
| 7    | F32A5.3             | serine carboxypeptidases (lysosomal cathepsin A)               | n/a                                      | lysosomal protective protein isoform a precursor  |
|      | C31C9.1/<br>tag-10  | apical gut membrane polyprotein                                | n/a                                      | n/a                                               |
|      | C34H4.3/<br>tag-244 | uncharacterized                                                | n/a                                      | n/a                                               |
|      | F53C11.1            | uncharacterized                                                | n/a                                      | n/a                                               |
|      | K08D8.6             | uncharacterized                                                | n/a                                      | n/a                                               |
| 8    | Y47H9C.1            | uncharacterized                                                | n/a                                      | n/a                                               |
| 9    | T03G6.3             | type I phosphodiesterase/nucleotide pyrophosphatase            | n/a                                      | ENPP6                                             |
|      | C53B7.1/<br>rig-3   | neuronal IGCAM                                                 | Ste, Let                                 | isoform 5 of neural cell adhesion molecule 1      |
|      | F54E2.1             | uncharacterized                                                | brood size variant                       | n/a                                               |
|      | R173.1/<br>cah-5    | carbonic anhydrase                                             | n/a                                      | carbonic anhydrase 7                              |
|      | F41D9.3/<br>wrk-1   | ephrin receptor-interacting immunoglobulin superfamily protein | n/a                                      | MAM domain-containing GPI-anchored protein 2      |
| 10   | F35E12.10           | uncharacterized                                                | n/a                                      | n/a                                               |
|      | ZK6.10/<br>dod-19   | determination of adult life span                               | ventral cord patterning variant          | n/a                                               |
| 11   | ZK6.11a             | uncharacterized                                                | ventral cord patterning variant          | n/a                                               |
|      | C05D9.3             | integrin beta subunit                                          | maternal Ste                             | isoform $\beta$ -3A of integrin $\beta$ -3        |
|      | F13B6.1             | determination of adult life span                               | Emb                                      | n/a                                               |
| 12   | Y119C1B.9           | uncharacterized                                                | n/a                                      | n/a                                               |

**Supplementary Table 1.** The list of possible GPI-anchored proteins identified in N2 by SyproRuby staining (Figure 1C). Ste, sterile; Emb, embryonic lethal; Let, Lethal; Lva, Larval arrest

Supplementary Table 2

| Band | CDS/<br>Public name  | Description                                                    | Phenotype                             | Human homolog                                    |
|------|----------------------|----------------------------------------------------------------|---------------------------------------|--------------------------------------------------|
| 1    | F57F4.4              | positive regulation of growth rate                             | Ste, Emb, Sck, Let                    | stabilin-2                                       |
|      | F57F4.3*/<br>gfi-1   | positive regulation of growth rate                             | locomotion variant                    | mucin-5AC (fragment)                             |
| 6    | Y41D4B.16*/<br>hpo-6 | uncharacterized                                                | n/a                                   | isoform 2 of mucin-3A                            |
|      | F23B2.11*/<br>pcp-3  | prolyl carboxypeptidase like                                   | n/a                                   | thymus-specific serine protease                  |
| 9    | K11H12.4*            | uncharacterized                                                | n/a                                   | n/a                                              |
|      | ZK896.5              | uncharacterized                                                | n/a                                   | n/a                                              |
| 9    | F19C7.2              | serine-type peptidase activity                                 | n/a                                   | thymus-specific serine protease                  |
| 10   | C31C9.1a*/<br>tag-10 | apical gut membrane polyprotein                                | n/a                                   | n/a                                              |
|      | K08D8.6*             | uncharacterized                                                | n/a                                   | n/a                                              |
|      | F56F10.1             | serine-type peptidase activity                                 | n/a                                   | thymus-specific serine protease                  |
| 11   | C34H4.3*/<br>tag-244 | uncharacterized                                                | n/a                                   | n/a                                              |
|      | T16D1.2/<br>pho-4    | acid phosphatase activity                                      | n/a                                   | lysosomal acid phosphatase                       |
|      | T03G6.3*             | type I phosphodiesterase/nucleotide pyrophosphatase            | n/a                                   | ENPP6                                            |
|      | W05E10.4a*/<br>tre-3 | alpha, alpha-trehalase activity                                | n/a                                   | isoform 1 of trehalase                           |
|      | W05E10.4b*/<br>tre-3 | alpha, alpha-trehalase activity                                | n/a                                   | isoform 1 of trehalase                           |
| 12   | F54E2.1*             | uncharacterized                                                | brood size variant                    | n/a                                              |
|      | C34B7.1              | a divergent MYST acetyltransferase                             | n/a                                   | n/a                                              |
| 13   | C34H4.1*             | integral to membrane                                           | n/a                                   | n/a                                              |
|      | C05D9.3*             | integrin beta subunit                                          | maternal Ste                          | isoform b-3A of integrin b-3                     |
|      | F44E2.4              | predicted receptor-like serine/threonine kinase                | protein aggregation variant           | low density lipoprotein receptor                 |
| 14   | ZK6.10*/<br>dod-19   | determination of adult life span                               | ventral cord patterning variant       | n/a                                              |
|      | F35E12.10*           | uncharacterized                                                | n/a                                   | n/a                                              |
| 16   | F44D12.2             | transmembrane receptor protein S/T kinase activity             | n/a                                   | n/a                                              |
| 17   | ZK6.11a*             | uncharacterized                                                | ventral cord patterning variant       | n/a                                              |
| 18   | F15G9.5              | uncharacterized                                                | n/a                                   | n/a                                              |
|      | F01G10.6             | uncharacterized                                                | n/a                                   | n/a                                              |
|      | F32A5.3              | serine carboxypeptidases (lysosomal cathepsin A)               | n/a                                   | lysosomal protective protein isoform a precursor |
| 19   | F54E4.3*             | uncharacterized                                                | n/a                                   | n/a                                              |
|      | R173.1 */<br>cah-5   | carbonic anhydrase                                             | n/a                                   | carbonic anhydrase 7                             |
| 20   | C44B7.5*             | dopamine beta-monooxygenase activity                           | n/a                                   | n/a                                              |
|      | F27E5.4*/<br>phq-1   | embryonic development ending in birth or egg hatching, mitosis | Slo, mitosis variant                  | growth arrest-specific protein 1                 |
| 21   | D1054.10             | uncharacterized                                                | n/a                                   | n/a                                              |
| 22   | K12B6.9              | uncharacterized                                                | n/a                                   | n/a                                              |
| 23   | K11H12.7             | uncharacterized                                                | n/a                                   | n/a                                              |
|      | Y40D12A.2*           | serine carboxypeptidases (lysosomal cathepsin A)               | Lva, Emb, protein aggregation variant | lysosomal protective protein isoform a precursor |
| 24   | C15H9.9*             | uncharacterized                                                | n/a                                   | n/a                                              |

**Supplementary Table 2.** The list of possible GPI-anchored proteins identified in N2 by silver staining (Supplementary Figure 5). Ste, sterile; Emb, embryonic lethal; Let, Lethal; Sck, unhealthy; Slo, Slow growth rate; Lva, Larval arrest. Proteins listed both in Supplementary Table 2 and 3 are indicated with asterisks.

Supplementary Table 3

| Band | CDS/<br>Public name  | Description                                                       | Phenotype                                                                                            | Human homolog                                       |
|------|----------------------|-------------------------------------------------------------------|------------------------------------------------------------------------------------------------------|-----------------------------------------------------|
| 2    | F15E11.4             | predicted receptor                                                | n/a                                                                                                  | n/a                                                 |
|      | C12D12.1a            | uncharacterized                                                   | n/a                                                                                                  | mucin-2                                             |
| 3    | F57F4.3*<br>gfi-1    | positive regulation of growth rate                                | locomotion variant                                                                                   | mucin-5AC (fragment)                                |
|      | Y16B4A.2             | serine-type carboxypeptidase activity                             | n/a                                                                                                  | lysosomal protective protease isoform a precursor   |
| 6    | Y41D4B.16*           | uncharacterized                                                   | n/a                                                                                                  | isoform 2 of mucin-3A                               |
| 7    | W05E10.4a*/<br>tre-3 | alpha,alpha-trehalase activity                                    | n/a                                                                                                  | isoform 1 of trehalase                              |
|      | W05E10.4b*/<br>tre-3 | alpha,alpha-trehalase activity                                    | n/a                                                                                                  | isoform 1 of trehalase                              |
| 8    | Y37E11AR.6/<br>vab-2 | ephrin, ligand for ephrin receptor tyrosine kinase                | head notched,<br>head morphology variant,<br>aldicarb hypersensitive,<br>organism morphology variant | ephrin-B2                                           |
|      | F35E12.8a            | uncharacterized                                                   | n/a                                                                                                  | n/a                                                 |
|      | F23B2.11*/<br>pcp-3  | prolyl carboxypeptidase like                                      | n/a                                                                                                  | thymus-specific serine protease                     |
| 9    | ZK896.4              | uncharacterized                                                   | n/a                                                                                                  | n/a                                                 |
|      | C31C9.1a*/<br>tag-10 | apical gut membrane polyprotein                                   | n/a                                                                                                  | n/a                                                 |
|      | K08D8.6*             | uncharacterized                                                   | n/a                                                                                                  | n/a                                                 |
|      | F58H7.1              | uncharacterized                                                   | n/a                                                                                                  | collagen, type XI, $\alpha$ 2                       |
| 10   | T03G6.3*             | type I phosphodiesterase/nucleotide pyrophosphatase               | n/a                                                                                                  | ENPP6                                               |
|      | F54E2.1*             | uncharacterized                                                   | brood size variant                                                                                   | n/a                                                 |
|      | C34H4.3*/<br>tag-244 | uncharacterized                                                   | n/a                                                                                                  | n/a                                                 |
| 11   | K11H12.4*            | uncharacterized                                                   | n/a                                                                                                  | n/a                                                 |
| 12   | C05D9.3*             | integrin beta subunit                                             | maternal Ste                                                                                         | isoform $\beta$ -3A of integrin $\beta$ -3          |
|      | C34H4.1*             | unnamed protein                                                   | n/a                                                                                                  | n/a                                                 |
|      | F35E12.10*           | uncharacterized                                                   | n/a                                                                                                  | n/a                                                 |
| 13   | ZK6.10*/<br>doc-19   | determination of adult life span                                  | ventral cord patterning variant                                                                      | n/a                                                 |
| 14   | ZK6.11a*             | uncharacterized                                                   | ventral cord patterning variant                                                                      | n/a                                                 |
| 16   | R173.1*/<br>cah-5    | carbonic anhydrase                                                | n/a                                                                                                  | carbonic anhydrase 7                                |
|      | Y40D12A.2*           | serine carboxypeptidases (lysosomal cathepsin A)                  | Lva, Emb, protein aggregation<br>variant                                                             | lysosomal protective protein<br>isoform a precursor |
| 17   | C44B7.5*             | dopamine beta-monoxygenase activity                               | n/a                                                                                                  | n/a                                                 |
| 19   | F54E4.3*             | uncharacterized                                                   | n/a                                                                                                  | n/a                                                 |
| 21   | C15H9.9*             | uncharacterized                                                   | n/a                                                                                                  | n/a                                                 |
|      | F27E5.4*/<br>phg-1   | embryonic development ending in birth or egg hatching,<br>mitosis | Slo, mitosis variant                                                                                 | growth arrest-specific protein 1                    |
| 22   | C02B10.3             | a predicted secreted protein containing EGF-like repeats          | n/a                                                                                                  | cDNA FLJ51576, highly similar<br>to Jagged-1        |

**Supplementary Table 3.** The list of possible GPI-anchored proteins identified in *piga-1(tm2939) Ex[P<sub>lag-2</sub>::piga-1::egfp]* by silver staining (Supplementary Figure 5). Ste, sterile; Emb, embryonic lethal; Slo, Slow growth rate; Lva, Larval arrest. Proteins listed both in Supplementary Table 2 and 3 are indicated with asterisks.



## Supplementary Table 4

| Amplified products                  | Primer sequences |                                                        |
|-------------------------------------|------------------|--------------------------------------------------------|
| <i>Y48E1B.2</i> cDNA                | Forward          | 5'- AA <u>ACT</u> CCAAAAACCCCACTACC -3'                |
|                                     | Reverse          | 5'- TTCCTGTCGTTCTTCTTCC -3'                            |
| <i>T27F7.4</i> cDNA                 | Forward          | 5'- ATGCGCACTACACTTCGTTT -3'                           |
|                                     | Reverse          | 5'- GTACCCATTCCGACACAACAC -3'                          |
| <i>C27A12.9</i> cDNA                | Forward          | 5'- ATGGGATCAATAATTCGAATACTC -3'                       |
|                                     | Reverse          | 5'- GCTTCACTATTCTTGAATTTCTCG -3'                       |
| <i>T22C1.3</i> cDNA                 | Forward          | 5'- ATGGCAAAGGACAAGAAATTACA -3'                        |
|                                     | Reverse          | 5'- GTCGTCGCGAGTAAACGAAG -3'                           |
| <i>B0511.13</i> cDNA                | Forward          | 5'- ATGATATGGCTTAAAAATTTGCGA -3'                       |
|                                     | Reverse          | 5'- CTGTTCAAGAGCCGGTTGATT -3'                          |
| <i>dpm-1</i> genomic sequence       | Forward          | 5'- TTTCAGATTATTATGACATCCACTCC -3'                     |
|                                     | Reverse          | 5'- CCAAACAAATGCAAACAGATAGA -3'                        |
| <i>lag-2</i> promoter               | Forward          | 5'- CCGGAATTTTGATTGTAGGC -3'                           |
|                                     | Reverse          | 5'- CATTCTGAAAAAAGGCAAAT -3'                           |
| <i>lim-7</i> promoter               | Forward          | 5'- GAGGTTGGCTGATCCCTCTC -3'                           |
|                                     | Reverse          | 5'- TTCTGAAAAATGAAAGCTCGATTAAC -3'                     |
| <i>sth-1</i> promoter               | Forward          | 5'- TCTCCCTGATCTGGATTGGA -3'                           |
|                                     | Reverse          | 5'- CATGTTGCTCTAGCACAAAAAGAC -3'                       |
| <i>pie-1</i> promoter               | Forward          | 5'- AATTGAAAGTTTTGTGGGAAA -3'                          |
|                                     | Reverse          | 5'- CTGAAAAGAAAATTTGATTTTAAAT -3'                      |
| <i>pie-1</i> 3 <sup>rd</sup> intron | Forward          | 5'- TAGGATCCGTGCTGATCGGATGGAAAT -3'                    |
|                                     | Reverse          | 5'- TAGGATCCGGTCTCCGATTCTGGAAGTAAA -3'                 |
| <i>pie-1</i> 3' sequence            | Forward          | 5'- TA <u>AGATC</u> ITTTTGCCGATTTTCCATATTTT -3'        |
|                                     | Reverse          | 5'- TA <u>ACATG</u> TCAGGATTTTCCATCATTTTTC -3'         |
| <i>piga-1</i> genomic sequence      | Forward          | 5'- CAC <u>GCGGCCG</u> CATGTCGCTAAAAATTGGTCCG -3'      |
|                                     | Reverse          | 5'- TAT <u>GCGGCCG</u> CACTGATAGTCAGGATCAACATTTTTC -3' |
| <i>wrk-1</i> genomic sequence       | Forward          | 5'- TAT <u>GCGGCCG</u> CATGATGAAATTGGTTCTGCT -3'       |
|                                     | Reverse          | 5'- TAT <u>AGATC</u> ITTTAAAAATAAAGATACATTGTGACT -3'   |
| <i>wrk-1</i> promoter               | Forward          | 5'- TAT <u>GCGGCCG</u> CCTCTTCTCGATGCCCTTCT -3'        |
|                                     | Reverse          | 5'- TAT <u>GCGGCCG</u> CCTGAAAAAAGAAAATGTTGAAAA -3'    |
| <i>egfp</i>                         | Forward          | 5'- TATGGATCCATGGTGAGCAAGGGCGAG -3'                    |
|                                     | Reverse          | 5'- TATGGATCCCTGTACAGCTCGTCCATGC -3'                   |

**Supplementary Table 4.** The list of primers used in plasmid construction. Restriction sites are underlined.
